# Supplementary material for: Regenerable electrochemical immunological sensing at DNA nanostructure-decorated gold surfaces
Source: Royal Society of Chemistry journal article supplement (doi:10.1039/c1cc11660f), 2011-01-01
Supplement: c1cc11660f.pdf [file c1cc11660f.pdf]

## Electronic Supplementary Information (ESI)

# Regenerable electrochemical immunological sensing at DNA nanostructure-decorated gold surfaces

Hao Pei<sup>a</sup>, Ying Wan<sup>b</sup>, Jiang Li<sup>a</sup>, Haiyan Hu<sup>a</sup>, Yan Su<sup>b</sup>, Qing Huang<sup>a</sup>,  
Chunhai Fan<sup>\*a</sup>

<sup>a</sup> Laboratory of Physical Biology, Shanghai Institute of Applied Physics, Chinese Academy of Sciences, Shanghai 201800, China.

<sup>b</sup> School of Mechanical Engineering, Nanjing University of Science and Technology, Nanjing 210094, Jiansu, China.

**\*Author for correspondence:**

E-mail: [fchh@sinap.ac.cn](mailto:fchh@sinap.ac.cn) (Chunhai Fan)

Fax: (+) 86-21-3919-4702;

Tel: +86 21-39197129;

## Experiment section

Materials: tris-(hydroxymethyl)aminomethane was from Cxbio Biotechnology Ltd. Ethylenediaminetetraacetic acid (EDTA), 11-MU ( 11-mercapto-1-undecanol ), 11 MUA ( 11-mercaptoundecanoic acid ), and tris(2-carboxyethyl) phosphine hydrochloride (TCEP) were purchased from Sigma-Aldrich (St. Louis, MO). TMB substrate (TMB = 3,3',5,5'-tetramethylbenzidine; Neogen K-blue low activity substrate) was from Neogen (U.S.A.). Avidin-HRP(horseradish peroxidase) was from Roche Diagnostics (Mannheim, Germany). Affinity purified anti-mouse TNF- $\alpha$ , biotin anti-mouse TNF- $\alpha$  cocktail and recombinant mouse TNF- $\alpha$  were purchased from eBioscience. The buffer solutions involved in this study are as follows: the hybridization buffer was 1M NaCl and 10mM TE buffer (pH 7.4). The buffer for iTSP assembly was 20mM Tris(pH8.0), 50mM MgCl<sub>2</sub>. The DNA immobilization buffer was 10mM Tris-HCl, 1mM EDTA, 10mM TECP(pH 7.4), and 1M NaCl. The washing buffer was 0.1M NaCl and 10mM PB buffer (pH 7.4). Enzyme diluent was 0.1M PBS buffer with 0.5% casein (pH 7.2). All solutions were prepared with Milli-Q water (18M $\Omega$ -cm resistivity) from a Millipore system. All oligonucleotides were synthesized and purified by TaKaRa Inc.(Dalian, china), , which are shown in table S1.

**Table S1: DNA sequence**

| <i>DNA Name</i> | <i>sequence (5'-3')</i>                                                               |
|-----------------|---------------------------------------------------------------------------------------|
| iTSP-A          | ACATTCCTAAGTCTGAAACATTACAGCTTGCTACACGAGAAGAGCCGCCATAGTA<br>TTTTTTTTTTGTATCCAGTG GCTCA |
| iTSP-B          | HS-TATCACCAGGCAGTTGACAGTGTAGCAAGCTGTAATAGATGCGAGGGTCCAATAC                            |
| iTSP-C          | HS-TCAACTGCCTGGTGATAAAACGACACTACGTGGGAATCTACTATGGCGGCTCTTC                            |
| iTSP-D          | HS-TTCAGACTTAGGAATGTGCTTCCCACGTAGTGTCGTTTGTATTGGACCCTCGCAT                            |
| T1              | Biotin-TGAGCCACTGGATAC                                                                |
| T2              | Biotin-TGAGCCGCTGGATAC                                                                |
| Linker1         | HOOC-TGAGCCACTGGATAC                                                                  |
| Linker2         | HOOC-TGAGCCGCTGGATAC                                                                  |

### Formation of DNA Tetrahedra probe

Mixed the four oligonucleotides ( iTSP-A, iTSP-B, iTSP-C and iTSP-D ) in equimolar quantities in TM buffer (20 mM Tris, 50 mM MgCl<sub>2</sub>, pH 8.0), heated the mixture to 95°C 2min and then cooled to 4°C in 30 s.

### Gel electrophoresis

The iTSP were analyzed using polyacrylamide gel electrophoresis (PAGE, 10%) in TBE buffer at a constant current of 5 mA at 4°C.

### **Gold Electrode treatment.**

The gold electrodes are 2-mm-diameter Gold working electrode (CHI101 CH Instruments Inc.)

The procedure of the electrode treatment before DNA self-assembly is as followed:

First, Polish gold electrodes on microcloth with three micropolish deagglomerated alumina suspensions (1.0, 0.3 and 0.05  $\mu\text{m}$  in diameter) in sequence for 5 min each. Rinse the electrodes extensively with water after each polishing step. Second, sonicate polished electrodes sequentially in ethanol and Milli-Q water for 5 min each, to remove residual alumina powder. Remove any residual impurities from the gold electrodes through electrochemical oxidation and reduction of the metal. Third, apply a positive potential of 2 V to the electrodes for 5 s, followed by a negative potential of -0.35 V for 10 s. Then run 5-10 cycles of cyclic voltammetry (CV) in 3 mL of 0.5 M H<sub>2</sub>SO<sub>4</sub> solution with potential range (-0.3 to 1.55V) in a 4 V s<sup>-1</sup> scan rate. Fourth, check the cleanness of the gold electrodes by running a CV cycle in a fresh 0.5 M H<sub>2</sub>SO<sub>4</sub> solution with potential range (-0.3 to 1.55V) in a 0.1 V s<sup>-1</sup> scan rate.

The roughness factor of the gold surface was determined electrochemically from the charge required for the formation and reduction of gold oxide and was estimated about 1.2.

### **Electrochemical measurements.**

Electrochemical measurements were performed with a CHI 660 electrochemical workstation (CH Instruments Inc., Ausin, TX). A conventional three-electrode configuration was employed all through the experiment, involving a gold working electrode, a Ag/AgCl reference electrode, and a platinum counter electrode. A glass cell with 3 mL of Neogen K-blue low activity substrate was placed on a cell stand. All potentials were referred to the Ag/AgCl (3 M KCl) electrode, and all measurements were carried out at a scan rate of 100mV/s. Amperometric detection was performed at a fixed potential of 100 mV, and the steady state was usually reached and recorded within 100s.

### **TSP-based immunoassays**

iTSP (1  $\mu\text{M}$ ) was first incubated with the cleaned electrodes for 3 h at room temperature, and then hybridized with a protein linker (100 nM). Capture antibodies (Ab<sub>1</sub>) were attached by first depositing 3  $\mu\text{L}$  of freshly prepared 400 mM EDC and 100 mM NHS in 1  $\times$  PBS onto the TSP-modified electrode and washing with 1  $\times$  PBS after 15min. This was followed by treatment with 3  $\mu\text{L}$  of 100  $\mu\text{g}/\text{mL}$  anti-mouse TNF- $\alpha$  in pH 7.0 PBS buffer for 2 h. After washed with 1  $\times$  PBS, the electrodes was incubated with 3  $\mu\text{L}$  of standard solution containing TNF- $\alpha$  (0 - 2.5 ng/mL) in 1 % BSA, 1  $\times$  PBS buffer for 1 h. The electrodes were incubated with 50  $\mu\text{g}/\text{mL}$  biotinylated anti-mouse TNF- $\alpha$  cocktail for 1 h, rinsed thoroughly with 1  $\times$  PBS, incubated with streptavidin-HRP conjugates for 0.5 h, consecutively. The sensor was then extensively rinsed and subjected to electrochemical measurements. For regenerate experiments, the electrodes were rinsed with 1  $\times$  PBS at 45  $^{\circ}\text{C}$  for 30 s.

### Control experiment:

We carried out a control experiment to confirm that the observed current change was only specific to the binding of TNF- $\alpha$ . As shown in Figure 2b, 1% BSA did not lead to signal increase ( $\sim 35$  nA), which was markedly lower than that for 5 ng/mL of TNF- $\alpha$  ( $\sim 1276$  nA). This study confirms that the antibody retains high activity after attaching onto iTSP surface and iTSP platform possesses excellent specificity for protein.

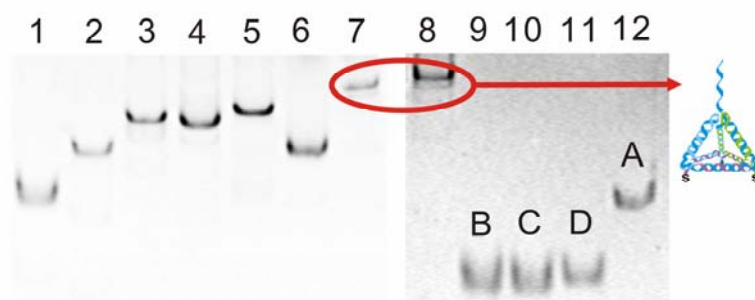

**Fig. S1** Gel electrophoretic analysis of the formation of iTSP. Lane 7 and Lane 8 stand for lane 8 for iTSP. Control experiment for single-stranded (ss-) DNA (lane 9 stands for iTSP-B, lane 10 stands for iTSP-C, lane 11 stands for iTSP-D, lane 12 stands for iTSP-A) or any other combinations lacking one (lane 3 stands for iTSP-A + iTSP-B+ iTSP-C, lane 4 stands for iTSP-A + iTSP-B+ iTSP-D, lane 5 stands for iTSP-A + iTSP-C+ iTSP-D, lane 6 stands for iTSP-B + iTSP-C+ iTSP-D) or two strands(lane 1 stands for iTSP-C + iTSP-D , lane 2 stands for iTSP-A + iTSP-B).

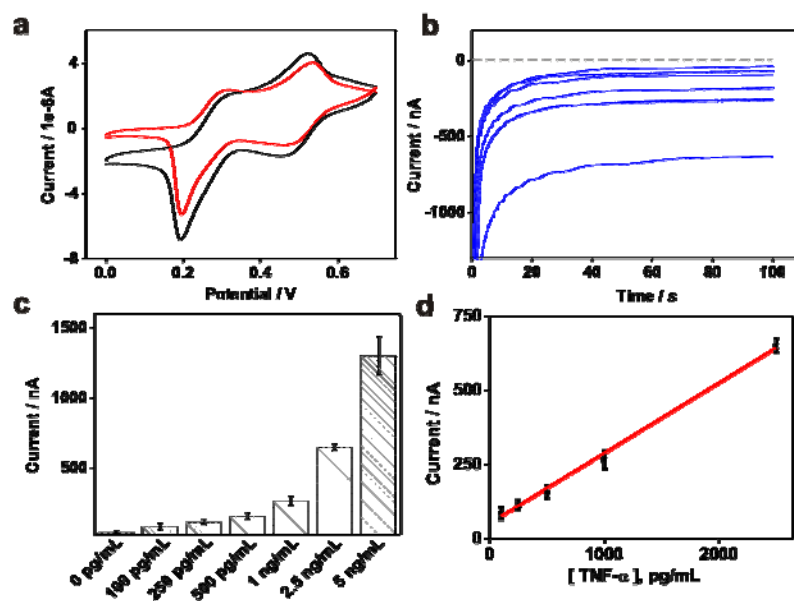

**Fig. S2** (a) CVs for iTSP in the absence (red line) and presence of 5 ng/mL TNF- $\alpha$  (black line). Scan rate: 100 mV / s. (b) Amperometric curves (i-t) for iTSP tested in solution with a series of TNF- $\alpha$  concentrations. From top to bottom: 0, 100 pg/mL, 250 pg/mL, 500 pg/mL, 1 ng/mL, 2.5 ng/mL. (c) Concentration profiles for the detection of TNF- $\alpha$ . (d) Plot for concentration of TNF- $\alpha$  vs. amperometric current.

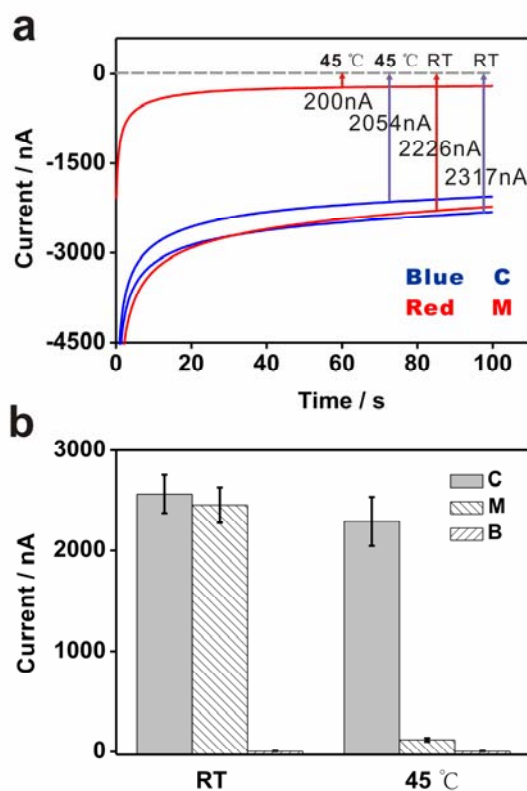

**Fig. S3** (a) Amperometric curves (i-t) for the iTSP sensor at different temperature. The bridge DNA contains either C: fully complementary (A:T), or M: one-base mismatch (G:T). B stands for blank. (b) Comparison of hybridization efficiency at different temperature for fully complementary bridge DNA and single-base mismatched (G:T) bridge DNA.
